# Supplementary material
Source: publisher figshare collection journal article supplement (https://sage.figshare.com/ndownloader/files/18044414)
Supplement: Supplementary file 1 [file 18044414]

## Appendix 1 – Sample characteristics

Table 1

*Individual characteristics of all respondents in the sample*

|                                                   | Mean (SD)    | %    |
|---------------------------------------------------|--------------|------|
| Age                                               | 33.81 (11.1) |      |
| Gender (Female)                                   |              | 51.1 |
| Social class                                      |              |      |
| Low                                               |              | 0.03 |
| Low Middle                                        |              | 20.8 |
| Middle                                            |              | 52.1 |
| High Middle                                       |              | 21.7 |
| High                                              |              | 1.7  |
| Don't know                                        |              | 0.6  |
| Professional status                               |              |      |
| Employed journalist                               |              | 25.3 |
| Trainee/Intern                                    |              | 10.4 |
| Independent journalist (or<br>have my own outlet) |              | 5.8  |
| Freelancer                                        |              | 10.4 |
| Unemployed                                        |              | 13.4 |
| Other                                             |              | 9    |
| Press secretary                                   |              | 16.1 |
| Web-related                                       |              | 1.7  |
| Journalism professor<br>mainly                    |              | 6.1  |
| Journalism student mainly                         |              | 1.7  |
| Years of experience                               | 10.03 (8.79) |      |

Figure 1

*Geolocation of respondents in the sample, based on their coordinates while taking the survey:*

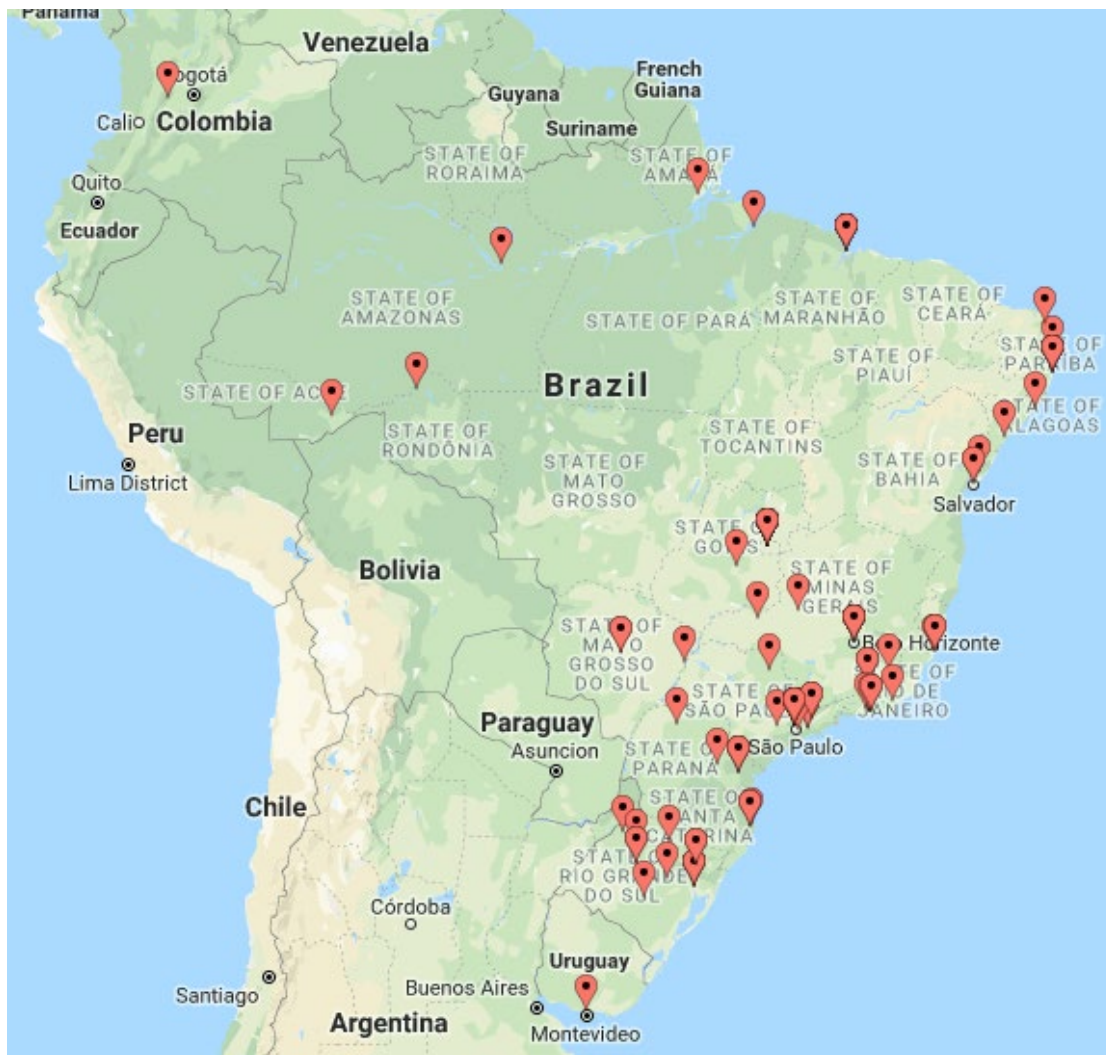

Table 2

*Characteristics of the outlets that employ journalists in the sample (only those employed full time)*

| <b>Outlet characteristics</b> | <b>%</b> |
|-------------------------------|----------|
| <i>Type of outlet</i>         |          |
| Broadcast TV                  | 13.6     |
| Cable TV                      | 0.4      |
| Newspaper                     | 22       |
| Radio                         | 7.6      |
| Community radio               | 0.8      |
| Magazine                      | 10.8     |
| News Wire Service             | 3.2      |
| Online                        | 32.8     |
| Other                         | 8.8      |
| <i>Scope</i>                  |          |
| Local                         | 14.6     |
| Regional                      | 32.9     |
| Nacional                      | 34.6     |
| International                 | 17.9     |
| <i>Size of newsroom</i>       |          |
| 1 - 5 people                  | 28.9     |
| 6 - 10 people                 | 12.9     |
| 11 - 20 people                | 14.9     |
| 21 - 50 people                | 14.9     |
| 51 - 100 people               | 12       |
| More than 100 people          | 16.5     |
